# Supplementary material for: Dopamine-Depleted Dopamine Transporter Knockout (DDD) Mice: Dyskinesia with L-DOPA and Dopamine D1 Agonists
Source: MDPI journal article supplement (doi:10.3390/biom13111658), 2023-11-17
Supplement: s1 [file Table S1.pdf › Table S1.pdf]

**Supplementary Table S1.** Effects of D1R compounds on oral stereotypies in DDD mice<sup>a</sup>.

| Drug <sup>c,d</sup> | Oral Stereotypy <sup>b</sup> |                          |
|---------------------|------------------------------|--------------------------|
|                     | OF <sup>d,e,f</sup>          | CM <sup>d,e,f</sup>      |
| Vehicle             | 0.5 ±0.21                    | 0.1 ±0.09                |
| 5 SKF               | 2.4 ±0.48 <sup>g</sup>       | 1.8 ±0.27 <sup>ggg</sup> |
| 5 MLM               | 1.9 ±0.43                    | 3.1 ±0.60 <sup>gg</sup>  |
| 10 MLM              | 1.9 ±0.34 <sup>g</sup>       | 3.0 ±0.59 <sup>gg</sup>  |

<sup>a</sup>DDD mice were treated with 125 mg/kg AMPT plus 6/12.5 mg/kg L-DOPA/ Benz and tested with compounds (Figure 1A).

<sup>b</sup>Behaviors were scored beginning at 5-min after drug administration at 10-min intervals over 85 min.

<sup>c</sup>Doses of drugs (in order): 5 mg/kg SKF81297, 5 mg/kg MLM55-38, and 10 mg/kg MLM55-38.

<sup>d</sup>Abbreviations: OF, open field; CM, circular maze; SKF, SKF81297; MLM, MLM55-38.

<sup>e</sup>ANOVA: OF [drug:  $F(3,39)=7.077$ ,  $P=0.014$ ], Welch ANOVA CM [drug:  $F(3,16.473)=21.686$ ,  $P<0.001$ ].

<sup>f</sup>Results presented as means ±SEMs; N=10-11 mice/group (OF) and N=9-11 mice/group (CM).

<sup>g</sup> $P<0.05$ , <sup>gg</sup> $P<0.01$ , <sup>ggg</sup> $P<0.001$ , vehicle vs. drug groups within test context.
