# Supplementary material for: Dopamine-Depleted Dopamine Transporter Knockout (DDD) Mice: Dyskinesia with L-DOPA and Dopamine D1 Agonists
Source: MDPI journal article supplement (doi:10.3390/biom13111658), 2023-11-17
Supplement: s1 [file Table S2.pdf › Table S2.pdf]

**Supplementary Table S2.** Effects of D1R compounds on DDD mice without L-DOPA/Benz<sup>a</sup>.

|                                       | Vehicle <sup>b,c</sup> | 5 mg/kg SKF <sup>b,c</sup>   | 5 mg/kg MLM <sup>b,c</sup> | 10 mg/kg MLM <sup>b,c</sup> |
|---------------------------------------|------------------------|------------------------------|----------------------------|-----------------------------|
| Distance Traveled <sup>d,e</sup>      | 31.5 ±13.86            | 589.9 ±102.04 <sup>fff</sup> | 163.3 ±27.33 <sup>ff</sup> | 273.8 ±54.10 <sup>ff</sup>  |
| Vertical Activity Counts <sup>d</sup> | 28.2 ±25.32            | 24.5 ±9.97                   | 28.1 ±24.24                | 25.0 ±20.92                 |
| Supported Rearing <sup>d</sup>        | 0.0 ±0.00              | 0.2 ±0.17                    | 0.1 ±0.07                  | 0.1 ±0.07                   |
| Climbing <sup>d</sup>                 | 0.0 ±0.00              | 0.0 ±0.00                    | 0.0 ±0.00                  | 0.0 ±0.00                   |
| Oral Stereotypy <sup>d</sup>          | 0.0 ±0.00              | 0.0 ±0.00                    | 0.1 ±0.07                  | 0.1 ±0.07                   |

<sup>a</sup>The DDD mice had been sensitized to 6/12.5 mg/kg L-DOPA/Benz (with AMPT) and tested initially with the vehicle and D1R agonists (Figure 1). They were withdrawn from all treatments for 1 wk prior to testing responses (day 27) to the D1R agonists in the absence of L-DOPA/Benz but in the presence of AMPT.

<sup>b</sup>Results presented as means ±SEMs.

<sup>c</sup>N=17 mice/group (Veh), N=18 mice/group (SKF), N=14 mice/group (each dose of MLM).

<sup>d</sup>Behaviors were scored continually by photobeams or by the interval method beginning at 5 min after drug administration at 10-min intervals over 85 min.

<sup>e</sup>Welch ANOVA: drug [F(3,27.609) = 18.851,  $p < 0.001$ ].

<sup>ff</sup> $p < 0.01$ , <sup>fff</sup> $p < 0.001$ , vehicle vs. SKF81297 and/or MLM55-38.
